# Supplementary material
Source: PubMed Central journal article supplement (PMC3675240)
Supplement: mmc1.pdf [file mmc1.pdf]

## Supplemental Information

### A Recurrent *PDGFRB* Mutation

#### Causes Familial Infantile Myfibromatosis

Yee Him Cheung, Tenzin Gayden, Philippe M. Campeau, Charles A. LeDuc, Donna Russo, Van-Hung Nguyen, Jiancheng Guo, Ming Qi, Yanfang Guan, Steffen Albrecht, Brenda Moroz, Karen W. Eldin, James T. Lu, Jeremy Schwartzentruber, David Malkin, Albert M. Berghuis, Sherif Emil, Richard A. Gibbs, David L. Burk, Megan Vanstone, Brendan H. Lee, David Orchard, Kym M. Boycott, Wendy K. Chung, and Nada Jabado

Table S1. Clinical characteristics and *PDGFRB* mutations in four different families and five simplex cases with IM

| SUBJECT               | CLINICAL HISTORY                                                                                                              | TISSUE                             | GERMLINE<br>MUTATION<br>c.1681C>T | SOMATIC<br>MUTATION<br>c.1998C>A |
|-----------------------|-------------------------------------------------------------------------------------------------------------------------------|------------------------------------|-----------------------------------|----------------------------------|
| <b>FAMILIAL CASES</b> |                                                                                                                               |                                    |                                   |                                  |
| <b>Family 1</b>       |                                                                                                                               |                                    |                                   |                                  |
| I-1                   | Solitary myofibroma at a young age that did not require further treatment.                                                    | Blood                              | Heterozygous                      | Wild type                        |
| I-2                   | Unaffected                                                                                                                    | Blood                              | Wild type                         | Wild type                        |
| II-1                  | Diagnosed at the age of 4 years with multiple fibromas of the skin, the majority of which spontaneously regressed.            | Blood                              | Heterozygous                      | Wild type                        |
| II-2                  | Referred at 6 month of age with multiple myofibromas of the skin and visceral myofibroma of the orbit and supra-nasal region. | Blood/Tumor                        | Heterozygous                      | Wild type                        |
| <b>Family 2</b>       |                                                                                                                               |                                    |                                   |                                  |
| I-1                   | Unaffected                                                                                                                    | Colon tissue                       | Wild type                         | Wild type                        |
| I-2                   | Unaffected                                                                                                                    | Blood                              | Wild type                         | Wild type                        |
| II-2                  | Multiple subcutaneous on the cheeks, shoulder, back, abdominal wall                                                           | Blood                              | Heterozygous                      | Wild type                        |
| III-1                 | Mutiple myofibromas in first year of life                                                                                     | Tumor – abdominal wall             | Heterozygous                      | Heterozygous                     |
|                       |                                                                                                                               | Tumor – left upper gingival border | Heterozygous                      | Heterozygous                     |

|                      |                                                                                                                                   |                        |              |           |
|----------------------|-----------------------------------------------------------------------------------------------------------------------------------|------------------------|--------------|-----------|
|                      |                                                                                                                                   | Tumor – left neck mass | Heterozygous | Wild type |
|                      |                                                                                                                                   | Blood                  | Heterozygous | Wild type |
| <b>Family 3</b>      |                                                                                                                                   |                        |              |           |
| I-1                  | Unaffected                                                                                                                        | Blood                  | Wild type    | Wild type |
| I-2                  | Unaffected                                                                                                                        | Blood                  | Wild type    | Wild type |
| II-1                 | Multiple myofibromas that spontaneously resolved                                                                                  | Blood                  | Heterozygous | Wild type |
| II-2                 | Unaffected                                                                                                                        | Blood                  | Wild type    | Wild type |
| III-1                | Unaffected                                                                                                                        | Blood                  | Wild type    | Wild type |
| III-2                | Multiple myofibromas of the skin of the face and upper arms that spontaneously resolved at the age of 4 years                     | Blood                  | Heterozygous | Wild type |
| III-3                | Multiple myofibromas of the skin of the face and upper arms that spontaneously resolved at the age of 4 years                     | Blood                  | Heterozygous | Wild type |
| <b>Family 4</b>      |                                                                                                                                   |                        |              |           |
| I-1                  | Unaffected                                                                                                                        | Blood                  | Wild type    | Wild type |
| I-2                  | Left neck swelling at 7 months of age, which was subsequently excised and histopathology revealed fibromatosis                    | Blood                  | Heterozygous | Wild type |
| II-1                 | Visceral myofibroma of the abdominal wall and an ulcerated lesion over the left fifth metacarpophalangeal joint at 3 weeks of age | Blood                  | Heterozygous | Wild type |
| II-2                 | Unaffected                                                                                                                        | Blood                  | Wild type    | Wild type |
| II-3                 | Referred at 11 weeks of age with three tumors involving the scalp and trunk that subsequently regressed                           | Blood                  | Heterozygous | Wild type |
| <b>SIMPLEX CASES</b> |                                                                                                                                   |                        |              |           |
| Simplex 1            | Myofibroma of the cheek at birth                                                                                                  | Tumor                  | Wild type    | Wild type |
| Simplex 2            | Pelvic myofibroma resected at 34 days of age                                                                                      | Tumor                  | Wild type    | Wild type |
| Simplex 3            | Diagnosed at 13 days of age with large lesion originating from the right hemi-diaphragm                                           | Blood/Tumor            | Wild type    | Wild type |
| Simplex 4            | Visceral myofibroma at 5 days of age                                                                                              | Tumor                  | Wild type    | Wild type |
| Simplex 5            | Myofibromas of femur and lung at 1 month age                                                                                      | Blood/Tumor            | Wild type    | Wild type |

Table S2. PCR primer sequences used to validate c.1681C>T and c.1998C>A mutations in *PDGFRB*.

| <b>Mutation</b>         | <b>Primer sequence</b> |                            | <b>Amplicon length</b> |
|-------------------------|------------------------|----------------------------|------------------------|
| c.1681C>T (p.Arg561Cys) | Forward                | 5'-TGTCCTAGACGGACGAACCT-3' | 274 bp                 |
|                         | Reverse                | 5'-CAGAGAGTCTTCCCACCCAA-3' |                        |
| c.1998C>A (p.Asn666Lys) | Forward                | 5'-AGAATAGGCTCCTGTGGTGG-3' | 289 bp                 |
|                         | Reverse                | 5'-AGCAGGAGTGTGCTGTTGTG-3' |                        |
